# Supplementary material
Source: MDPI journal article supplement (https://www.mdpi.com/2073-4441/15/7/1332)

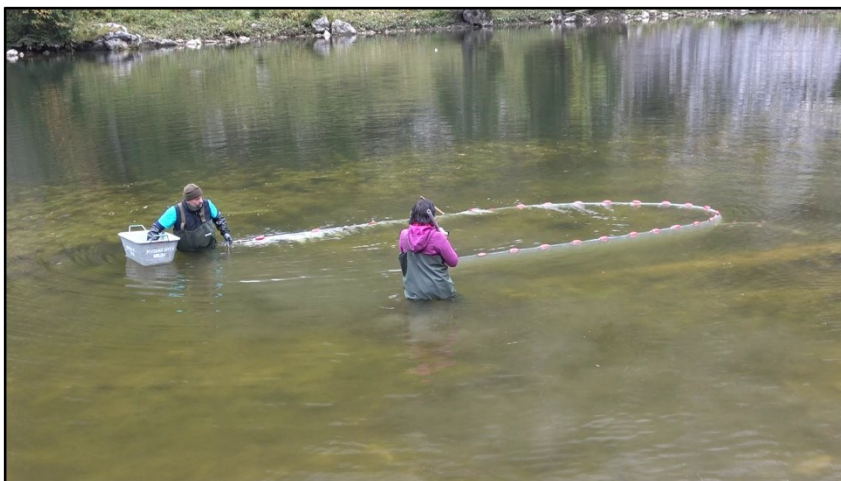

**Figure S1.** Purse seining in Lake Sulzkarsee.

Supplement: s1 [file s1]
